# Supplementary material
Source: publisher figshare collection journal article supplement (https://karger.figshare.com/ndownloader/files/12525734)
Supplement: Supplementary file 1 [file 12525734]

## Sheet: Sheet1
Supplementary Table 1A: Adrenals
	Injectable Hydrocortisone	Hydrocortisone, Prednisone, or Prednisolone	Fludrocortisone	Dexamethasone
Angola	No	Yes	No	Yes
Benin	Yes	Yes	Yes	Yes
Botswana	Yes	Yes	No	Yes
Burkina Faso	Yes	Yes	Yes	Yes
Burundi	Yes	Yes	No	Yes
Cameroon	Yes	Yes	No	Yes
Cape Verde	Yes	Yes	No	Yes
Central African Republic	Yes	Yes	No	Yes
Chad	Yes	Yes	No	Yes
Congo	Yes	Yes	Yes	Yes
Cote Ivoire	Yes	Yes	No	Yes
Democratic Republic of Congo	Yes	Yes	No	Yes
Eritrea	Yes	Yes	Yes	Yes
Ethiopia	Yes	Yes	No	Yes
Gabon	Yes	Yes	No	No
Gambia	Yes	Yes	No	No
Ghana	Yes	Yes	No	Yes
Guinea	Yes	Yes	No	No
Guinea-Bissau	Yes	Yes	Yes	Yes
Kenya	Yes	Yes	Yes	Yes
Lesotho	Yes	Yes	No	Yes
Liberia	Yes	Yes	No	Yes
Madagascar	Yes	Yes	No	Yes
Malawi	Yes	Yes	Yes	Yes
Mali	Yes	Yes	No	No
Mauritania	Yes	Yes	No	No
Mozambique	Yes	Yes	Yes	Yes
Namibia	Yes	Yes	No	Yes
Niger	Yes	Yes	No	No
Nigeria	Yes	Yes	Yes	Yes
Rwanda	Yes	Yes	No	Yes
Senegal	Yes	Yes	No	No
Seychelles	Yes	Yes	No	No
Sierra Leone	Yes	Yes	No	Yes
South Africa	Yes	Yes	Yes	No
Southern Sudan	Yes	Yes	No	No
Swaziland	Yes	Yes	No	Yes
Tanzania	Yes	Yes	No	Yes
Togo	Yes	Yes	Yes	Yes
Uganda	Yes	Yes	No	Yes
Zambia	Yes	Yes	No	Yes
Zimbabwe	Yes	Yes	Yes	Yes
